# Supplementary material for: Expanding pentafluorouranates: hydrothermal synthesis and characterization of β-NaUF5 and β-NaUF5·H2O
Source: Royal Society of Chemistry journal article supplement (doi:10.1039/c8ra05780j), 2018-01-01
Supplement: c8ra05780j1.pdf [file c8ra05780j1.pdf]

# Supporting Information

## Expanding Pentafluorouranates: Hydrothermal Synthesis and Characterization of $\beta$ -NaUF<sub>5</sub> and $\beta$ -NaUF<sub>5</sub>•H<sub>2</sub>O

Alexander T. Chemey, Joseph M. Sperling, and Thomas E. Albrecht-Schmitt\*,<sup>a</sup>

<sup>a</sup> Department of Chemistry and Biochemistry, Florida State University, Tallahassee, FL, 32306, United States

\* albrecht-schmitt@chem.fsu.edu

### Supporting Information Figure 1

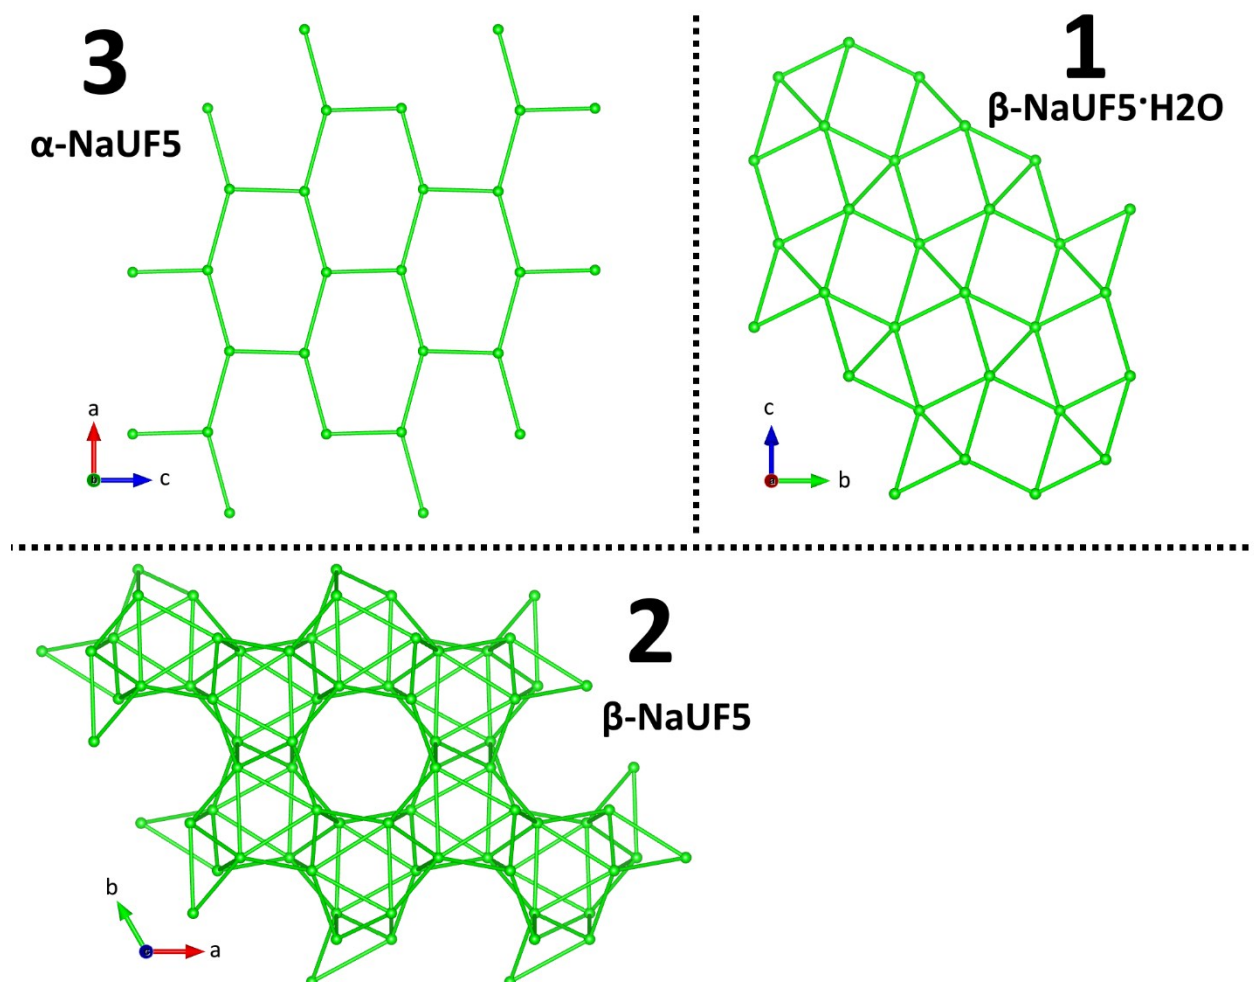

SI Figure 1: Wireframe comparison of the uranium networks in all three products. Particularly note that, although the absorption spectra of 1 and 3 are nearly identical (Figure 4 in the text), and they have similar uranium coordination environments, they have very different uranium networks.

## Supporting Information Figure 2

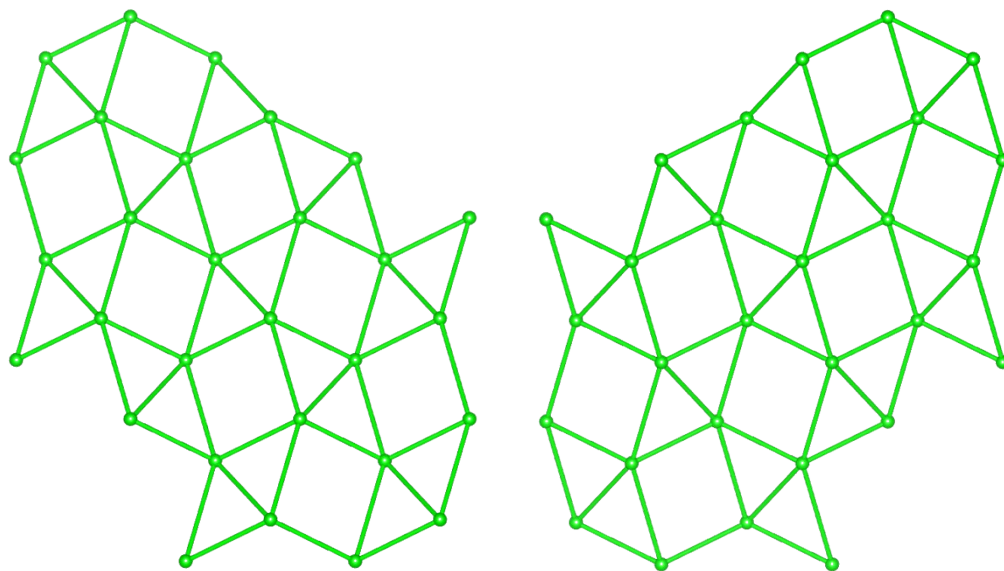

These layers of **1** are mirror images.

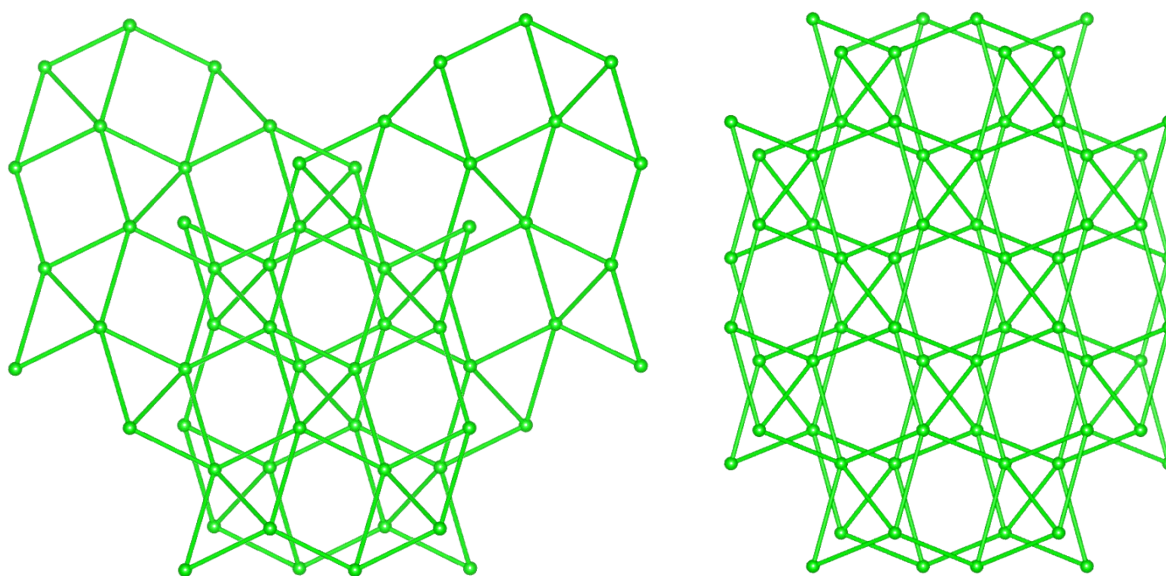

SI Figure 2: The generation of the layer structure of the alpha-hydrate from the **1** motif.

When superimposed (left), they generate the  $\alpha$ - $\text{NaUF}_5 \cdot \text{H}_2\text{O}$  template (right).

### Supporting Information Figure 3

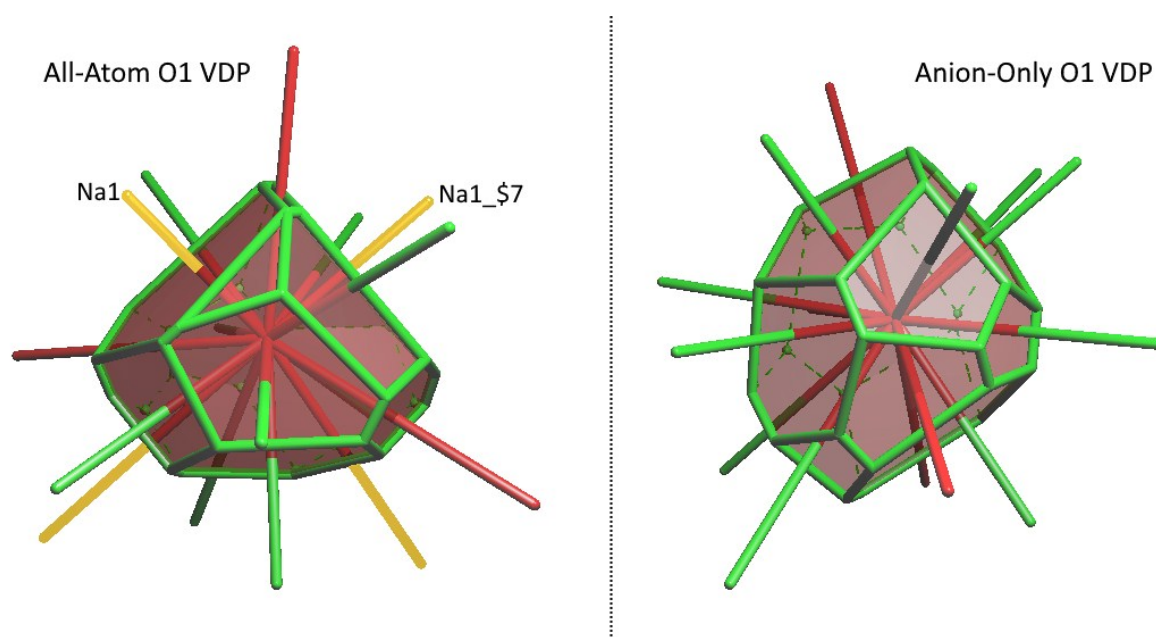

SI Figure 3: Voronoi-Dirichlet polyhedra for O1 with all atoms considered (left) and only anions (right).

### Supporting Information Figure 4

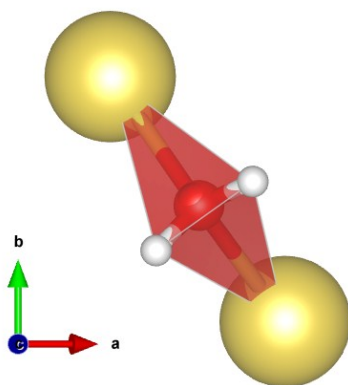

SI Figure 4: The coordination environment of O1 viewed down the c-axis, a distorted tetrahedron. Sodium atoms are yellow, and hydrogen atoms are white.

## Supporting Information Table 1

All Non-Hydrogen Atoms Dirichlet Calculation of 1

#####

1:Na, U F5, H2 O

#####

Central atom:O1 OxSt:-2 CN:2 0.998 0.511 0.810 Rsd:1.655

D(CP):0.244 ( 0.9819 0.5140 0.7811 )

D(VDP):0.134 ( 0.9984 0.5114 0.7946 )

Atom:2.367 < r < 3.749 <r>=3.218 Top: 1.808 < R < 2.055 <R>=1.945

CN=16:0:2 NV=32 V=18.996/93.871 S=38.109 Cpac=0.365 Ccov=1.913

G3=0.081560699

Face distribution: {4/2 5/8 6/8 }

Vertex distribution: {3/32 }

|     | Atom | x    | y    | z    | Distance (Å) | D1   | D2   | Solid Angle % |
|-----|------|------|------|------|--------------|------|------|---------------|
| 1   | Na1  | 1.13 | 0.30 | 1.02 | 2.37         | 1.66 | 0.71 | 16.34         |
| 2   | Na1  | 0.87 | 0.70 | 0.98 | 2.48         | 1.66 | 0.83 | 13.86         |
| 3   | F_3  | 1.13 | 0.66 | 0.57 | 2.87         | 1.66 | 1.22 | 10.12         |
| 4   | F_2  | 0.65 | 0.49 | 0.84 | 2.91         | 1.66 | 1.25 | 6.64          |
| 5   | F_4  | 0.65 | 0.58 | 0.55 | 2.99         | 1.66 | 1.34 | 8.32          |
| 6   | F_3  | 0.87 | 0.16 | 0.93 | 3.04         | 1.66 | 1.39 | 5.40          |
| 7   | F_5  | 1.37 | 0.71 | 0.89 | 3.15         | 1.66 | 1.49 | 6.96          |
| 8   | F_1  | 1.34 | 0.36 | 0.74 | 3.16         | 1.66 | 1.50 | 6.70          |
| 9   | F_3  | 1.13 | 0.85 | 1.07 | 3.20         | 1.66 | 1.54 | 4.55          |
| 10  | O_1  | 1.00 | 0.49 | 1.19 | 3.34         | 1.66 | 1.68 | 0.80          |
| 11  | F_3  | 0.87 | 0.35 | 0.43 | 3.34         | 1.66 | 1.69 | 5.37          |
| 12  | Na1  | 0.87 | 0.80 | 0.48 | 3.42         | 1.66 | 1.76 | 2.65          |
| *13 | F_2  | 1.35 | 0.51 | 1.16 | 3.45         | 1.66 | 1.79 | 1.37          |
| *14 | F_1  | 0.66 | 0.86 | 0.76 | 3.56         | 1.66 | 1.91 | 1.05          |
| 15  | F_5  | 0.63 | 0.21 | 0.61 | 3.57         | 1.66 | 1.92 | 2.57          |
| 16  | O_1  | 1.00 | 0.01 | 0.69 | 3.67         | 1.66 | 2.01 | 3.07          |
| 17  | O_1  | 1.00 | 1.01 | 0.69 | 3.67         | 1.66 | 2.01 | 3.07          |
| 18  | Na1  | 1.13 | 0.20 | 0.52 | 3.75         | 1.66 | 2.09 | 1.15          |

Elapsed time: 6.43 sec

## Supporting Information Table 2

Anion-Only Dirichlet Calculation of 1

#####

1:Na, U F5, H2 O

#####

Central atom:O1 OxSt:-2 CN:2 0.998 0.511 0.810 Rsd:1.773

D(CP):0.157 ( 1.0075 0.4913 0.8088 )

D(VDP):0.066 ( 1.0036 0.5068 0.8163 )

Atom:2.871 < r < 4.003 <r>=3.328 Top: 1.808 < R < 2.336 <R>=2.048

CN=15:0:0 NV=26 V=23.366/94.889 S=43.477 Cpac=0.530 Ccov=2.284

G3=0.080107027

Face distribution: {4/3 5/6 6/6 }

Vertex distribution: {3/26 }

|    | Atom | x    | y    | z    | Distance (Å) | D1   | D2   | Solid Angle % |
|----|------|------|------|------|--------------|------|------|---------------|
| 1  | F_3  | 1.13 | 0.66 | 0.57 | 2.87         | 1.77 | 1.10 | 11.07         |
| 2  | F_2  | 0.65 | 0.49 | 0.84 | 2.91         | 1.77 | 1.14 | 10.06         |
| 3  | F_4  | 0.65 | 0.58 | 0.55 | 2.99         | 1.77 | 1.22 | 9.31          |
| 4  | F_3  | 0.87 | 0.16 | 0.93 | 3.04         | 1.77 | 1.27 | 10.20         |
| 5  | F_5  | 1.37 | 0.71 | 0.89 | 3.15         | 1.77 | 1.38 | 6.98          |
| 6  | F_1  | 1.34 | 0.36 | 0.74 | 3.16         | 1.77 | 1.38 | 8.43          |
| 7  | F_3  | 1.13 | 0.85 | 1.07 | 3.20         | 1.77 | 1.42 | 8.82          |
| 8  | O_1  | 1.00 | 0.49 | 1.19 | 3.34         | 1.77 | 1.57 | 6.72          |
| 9  | F_3  | 0.87 | 0.35 | 0.43 | 3.34         | 1.77 | 1.57 | 5.82          |
| 10 | F_2  | 1.35 | 0.51 | 1.16 | 3.45         | 1.77 | 1.68 | 5.85          |
| 11 | F_1  | 0.66 | 0.86 | 0.76 | 3.56         | 1.77 | 1.79 | 4.06          |
| 12 | F_5  | 0.63 | 0.21 | 0.61 | 3.57         | 1.77 | 1.80 | 2.57          |
| 13 | O_1  | 1.00 | 1.01 | 0.69 | 3.67         | 1.77 | 1.90 | 4.01          |
| 14 | O_1  | 1.00 | 0.01 | 0.69 | 3.67         | 1.77 | 1.90 | 4.01          |
| 15 | F_4  | 1.35 | 0.08 | 0.95 | 4.00         | 1.77 | 2.23 | 2.09          |

Elapsed time: 5.15 sec.

### Supporting Information Table 3

Uranium-fluorine bond length and uranium-uranium distance comparison between  $\text{Na}_4\text{CuU}_6\text{F}_{30}$  and **2**

|                                          | $\text{Na}_4\text{CuU}_6\text{F}_{30}^{17}$ | $\beta\text{-NaUF}_5$ ( <b>2</b> ) |
|------------------------------------------|---------------------------------------------|------------------------------------|
| U-F non-bridging bond length (Å)         | 2.250(4)                                    | 2.196(4)                           |
| U-F ( $\mu^2$ ) bond lengths (Å)         | 2.268(3)-2.418(3)                           | 2.287(4)-2.435(4)                  |
| U-U double-fluoride bridge distances (Å) | 4.0266(3)-4.0700(4)                         | 4.0442(4)-4.1019(6)                |
| U-U single-fluoride bridge distances (Å) | 4.4851(3)-4.5088(2)                         | 4.5235(5)-4.5480(7)                |

17 J. Yeon, M. D. Smith, J. Tapp, A. Möller and H.-C. zur Loye, Application of a Mild Hydrothermal Approach Containing an in Situ Reduction Step to the Growth of Single Crystals of the Quaternary U(IV)-Containing Fluorides  $\text{Na}_4\text{MU}_6\text{F}_{30}$  (M =  $\text{Mn}^{2+}$ ,  $\text{Co}^{2+}$ ,  $\text{Ni}^{2+}$ ,  $\text{Cu}^{2+}$ , and  $\text{Zn}^{2+}$ ) Crystal Growth, Structures, and Magnetic Properties, *Journal of the American Chemical Society*, 2014, **136**, 3955–3963.

## Atomic coordinates and structural information of Product 1 - $\beta$ -NaUF<sub>5</sub>·H<sub>2</sub>O

### Crystal data

|                                                                          |                                                                                                            |
|--------------------------------------------------------------------------|------------------------------------------------------------------------------------------------------------|
| NaUF <sub>5</sub> ·H <sub>2</sub> O                                      | Monoclinic, $P2_1/c$                                                                                       |
| $M_r = 374.04$                                                           | $D_x = 5.334 \text{ Mg m}^{-3}$                                                                            |
| $a = 7.957 (3) \text{ \AA}$                                              | Mo K $\alpha$ radiation, $\lambda = 0.71073 \text{ \AA}$                                                   |
| $b = 7.027 (2) \text{ \AA}$                                              | Cell parameters from 996 reflections                                                                       |
| $c = 8.792 (3) \text{ \AA}$                                              | $\theta = 2.7\text{--}28.0^\circ$                                                                          |
| $\beta = 108.678 (7)^\circ$                                              | $\mu = 34.96 \text{ mm}^{-1}$                                                                              |
| $V = 465.7 (3) \text{ \AA}^3$                                            | $T = 297 \text{ K}$                                                                                        |
| $Z = 4$                                                                  | Thin tetragonal plates, emerald green                                                                      |
| $F(000) = 632$                                                           | $0.05 \times 0.05 \times 0.02 \text{ mm}$                                                                  |
| $R[F^2 > 2\sigma(F^2)] = 0.036$                                          | $wR(F^2) = 0.105$                                                                                          |
| $w = 1/[\sigma^2(F_o^2) + (0.0764P)^2]$ , where $P = (F_o^2 + 2F_c^2)/3$ | $\Delta\rho_{\text{max}} = 2.84 \text{ e \AA}^{-3}$ , $\Delta\rho_{\text{min}} = -2.47 \text{ e \AA}^{-3}$ |

### Fractional atomic coordinates and isotropic or equivalent isotropic displacement parameters ( $\text{\AA}^2$ )

|     | <i>x</i>    | <i>y</i>    | <i>z</i>    | $U_{\text{iso}}^*/U_{\text{eq}}$ |
|-----|-------------|-------------|-------------|----------------------------------|
| U1  | 0.57881 (4) | 0.16299 (5) | 0.85335 (4) | 0.0074 (2)                       |
| F2  | 0.3390 (8)  | 0.3605 (7)  | 0.7381 (8)  | 0.0121 (13)                      |
| F3  | 0.6455 (8)  | 0.4858 (8)  | 0.8413 (7)  | 0.0138 (12)                      |
| F1  | 0.8667 (10) | 0.1548 (8)  | 0.9336 (10) | 0.0236 (17)                      |
| F4  | 0.3451 (7)  | 0.0822 (9)  | 0.9506 (7)  | 0.0139 (12)                      |
| F5  | 0.6300 (9)  | 0.2883 (9)  | 1.1107 (7)  | 0.0189 (13)                      |
| Na1 | 1.1349 (7)  | 0.2974 (7)  | 1.0214 (6)  | 0.0276 (11)                      |
| O1  | 0.9980 (11) | 0.5106 (13) | 0.8115 (11) | 0.0287 (19)                      |
| H1  | 0.915 (5)   | 0.471 (7)   | 0.730 (4)   | 0.11 (9)*                        |
| H2  | 1.064 (6)   | 0.585 (6)   | 0.778 (6)   | 0.03 (3)*                        |

### Atomic displacement parameters ( $\text{\AA}^2$ )

|    | $U^{11}$   | $U^{22}$   | $U^{33}$   | $U^{12}$      | $U^{13}$     | $U^{23}$     |
|----|------------|------------|------------|---------------|--------------|--------------|
| U1 | 0.0088 (3) | 0.0065 (3) | 0.0074 (3) | -0.00006 (11) | 0.00308 (17) | 0.00032 (10) |
| F2 | 0.007 (3)  | 0.012 (3)  | 0.014 (3)  | -0.001 (2)    | -0.001 (2)   | 0.001 (2)    |
| F3 | 0.017 (3)  | 0.011 (3)  | 0.012 (3)  | -0.001 (2)    | 0.002 (2)    | 0.000 (2)    |
| F1 | 0.018 (4)  | 0.019 (4)  | 0.030 (4)  | 0.001 (2)     | 0.002 (3)    | -0.001 (2)   |
| F4 | 0.012 (3)  | 0.014 (3)  | 0.017 (3)  | -0.001 (2)    | 0.007 (2)    | 0.002 (2)    |

|     |           |           |           |            |           |            |
|-----|-----------|-----------|-----------|------------|-----------|------------|
| F5  | 0.031 (4) | 0.012 (3) | 0.017 (3) | -0.003 (3) | 0.014 (3) | -0.003 (3) |
| Na1 | 0.026 (3) | 0.020 (2) | 0.031 (3) | 0.003 (2)  | 0.001 (2) | -0.002 (2) |
| O1  | 0.021 (5) | 0.036 (5) | 0.031 (5) | -0.007 (4) | 0.011 (4) | 0.003 (4)  |

Geometric parameters (Å, °)

|                        |             |                                         |             |
|------------------------|-------------|-----------------------------------------|-------------|
| U1—F1                  | 2.171 (8)   | F3—U1 <sup>vi</sup>                     | 2.389 (6)   |
| U1—F2                  | 2.314 (6)   | F1—Na1                                  | 2.258 (9)   |
| U1—F5 <sup>i</sup>     | 2.322 (6)   | F4—U1 <sup>ii</sup>                     | 2.374 (6)   |
| U1—F5                  | 2.339 (6)   | F4—Na1 <sup>viii</sup>                  | 2.477 (8)   |
| U1—F3                  | 2.340 (6)   | F5—U1 <sup>ix</sup>                     | 2.322 (6)   |
| U1—F4                  | 2.352 (6)   | Na1—F3 <sup>vii</sup>                   | 2.341 (7)   |
| U1—F4 <sup>ii</sup>    | 2.374 (6)   | Na1—F2 <sup>x</sup>                     | 2.349 (8)   |
| U1—F3 <sup>iii</sup>   | 2.389 (6)   | Na1—O1                                  | 2.356 (10)  |
| U1—F2 <sup>iii</sup>   | 2.435 (6)   | Na1—O1 <sup>vii</sup>                   | 2.468 (10)  |
| U1—Na1 <sup>iv</sup>   | 3.804 (5)   | Na1—F4 <sup>xi</sup>                    | 2.477 (8)   |
| U1—Na1 <sup>v</sup>    | 3.906 (5)   | Na1—Na1 <sup>vii</sup>                  | 3.513 (10)  |
| U1—U1 <sup>ii</sup>    | 3.9424 (11) | Na1—U1 <sup>x</sup>                     | 3.804 (5)   |
| F2—Na1 <sup>iv</sup>   | 2.349 (8)   | Na1—U1 <sup>v</sup>                     | 3.906 (5)   |
| F2—U1 <sup>vi</sup>    | 2.435 (6)   | O1—Na1 <sup>vii</sup>                   | 2.468 (10)  |
| F3—Na1 <sup>vii</sup>  | 2.341 (7)   |                                         |             |
| F1—U1—F2               | 142.6 (2)   | F5 <sup>i</sup> —U1—U1 <sup>ii</sup>    | 150.80 (16) |
| F1—U1—F5 <sup>i</sup>  | 79.9 (3)    | F5—U1—U1 <sup>ii</sup>                  | 65.12 (17)  |
| F2—U1—F5 <sup>i</sup>  | 82.6 (2)    | F3—U1—U1 <sup>ii</sup>                  | 135.83 (15) |
| F1—U1—F5               | 81.8 (3)    | F4—U1—U1 <sup>ii</sup>                  | 33.65 (14)  |
| F2—U1—F5               | 93.5 (2)    | F4 <sup>ii</sup> —U1—U1 <sup>ii</sup>   | 33.29 (14)  |
| F5 <sup>i</sup> —U1—F5 | 143.69 (18) | F3 <sup>iii</sup> —U1—U1 <sup>ii</sup>  | 81.05 (14)  |
| F1—U1—F3               | 79.0 (2)    | F2 <sup>iii</sup> —U1—U1 <sup>ii</sup>  | 83.35 (15)  |
| F2—U1—F3               | 64.3 (2)    | Na1 <sup>iv</sup> —U1—U1 <sup>ii</sup>  | 97.63 (9)   |
| F5 <sup>i</sup> —U1—F3 | 72.9 (2)    | Na1 <sup>v</sup> —U1—U1 <sup>ii</sup>   | 67.25 (9)   |
| F5—U1—F3               | 73.0 (2)    | U1—F2—Na1 <sup>iv</sup>                 | 109.3 (3)   |
| F1—U1—F4               | 138.6 (3)   | U1—F2—U1 <sup>vi</sup>                  | 113.4 (3)   |
| F2—U1—F4               | 70.5 (2)    | Na1 <sup>iv</sup> —F2—U1 <sup>vi</sup>  | 109.5 (3)   |
| F5 <sup>i</sup> —U1—F4 | 139.6 (2)   | U1—F3—Na1 <sup>vii</sup>                | 138.6 (3)   |
| F5—U1—F4               | 69.6 (2)    | U1—F3—U1 <sup>vi</sup>                  | 114.2 (2)   |
| F3—U1—F4               | 117.9 (2)   | Na1 <sup>vii</sup> —F3—U1 <sup>vi</sup> | 107.0 (2)   |
| F1—U1—F4 <sup>ii</sup> | 75.4 (2)    | U1—F1—Na1                               | 152.0 (3)   |



|                                         |             |                                           |            |
|-----------------------------------------|-------------|-------------------------------------------|------------|
| F2—U1—F4 <sup>ii</sup>                  | 137.4 (2)   | U1—F4—U1 <sup>ii</sup>                    | 113.1 (2)  |
| F5 <sup>i</sup> —U1—F4 <sup>ii</sup>    | 134.0 (2)   | U1—F4—Na1 <sup>viii</sup>                 | 128.3 (3)  |
| F5—U1—F4 <sup>ii</sup>                  | 69.3 (2)    | U1 <sup>ii</sup> —F4—Na1 <sup>viii</sup>  | 107.2 (3)  |
| F3—U1—F4 <sup>ii</sup>                  | 136.7 (2)   | U1 <sup>ix</sup> —F5—U1                   | 156.5 (3)  |
| F4—U1—F4 <sup>ii</sup>                  | 66.9 (2)    | F1—Na1—F3 <sup>vii</sup>                  | 158.8 (4)  |
| F1—U1—F3 <sup>iii</sup>                 | 133.4 (2)   | F1—Na1—F2 <sup>x</sup>                    | 113.6 (3)  |
| F2—U1—F3 <sup>iii</sup>                 | 71.1 (2)    | F3 <sup>vii</sup> —Na1—F2 <sup>x</sup>    | 71.4 (2)   |
| F5 <sup>i</sup> —U1—F3 <sup>iii</sup>   | 74.3 (2)    | F1—Na1—O1                                 | 82.2 (3)   |
| F5—U1—F3 <sup>iii</sup>                 | 138.4 (2)   | F3 <sup>vii</sup> —Na1—O1                 | 94.1 (3)   |
| F3—U1—F3 <sup>iii</sup>                 | 126.94 (14) | F2 <sup>x</sup> —Na1—O1                   | 164.2 (4)  |
| F4—U1—F3 <sup>iii</sup>                 | 68.8 (2)    | F1—Na1—O1 <sup>vii</sup>                  | 84.7 (3)   |
| F4 <sup>ii</sup> —U1—F3 <sup>iii</sup>  | 95.7 (2)    | F3 <sup>vii</sup> —Na1—O1 <sup>vii</sup>  | 74.2 (3)   |
| F1—U1—F2 <sup>iii</sup>                 | 73.6 (2)    | F2 <sup>x</sup> —Na1—O1 <sup>vii</sup>    | 95.3 (3)   |
| F2—U1—F2 <sup>iii</sup>                 | 130.53 (11) | O1—Na1—O1 <sup>vii</sup>                  | 86.5 (3)   |
| F5 <sup>i</sup> —U1—F2 <sup>iii</sup>   | 71.4 (2)    | F1—Na1—F4 <sup>xi</sup>                   | 106.5 (3)  |
| F5—U1—F2 <sup>iii</sup>                 | 131.8 (2)   | F3 <sup>vii</sup> —Na1—F4 <sup>xi</sup>   | 94.3 (3)   |
| F3—U1—F2 <sup>iii</sup>                 | 137.9 (2)   | F2 <sup>x</sup> —Na1—F4 <sup>xi</sup>     | 64.4 (2)   |
| F4—U1—F2 <sup>iii</sup>                 | 103.7 (2)   | O1—Na1—F4 <sup>xi</sup>                   | 111.8 (3)  |
| F4 <sup>ii</sup> —U1—F2 <sup>iii</sup>  | 64.7 (2)    | O1 <sup>vii</sup> —Na1—F4 <sup>xi</sup>   | 159.3 (3)  |
| F3 <sup>iii</sup> —U1—F2 <sup>iii</sup> | 61.7 (2)    | F1—Na1—Na1 <sup>vii</sup>                 | 81.1 (3)   |
| F1—U1—Na1 <sup>iv</sup>                 | 151.1 (2)   | F3 <sup>vii</sup> —Na1—Na1 <sup>vii</sup> | 81.8 (2)   |
| F2—U1—Na1 <sup>iv</sup>                 | 35.64 (16)  | F2 <sup>x</sup> —Na1—Na1 <sup>vii</sup>   | 135.2 (3)  |
| F5 <sup>i</sup> —U1—Na1 <sup>iv</sup>   | 71.17 (19)  | O1—Na1—Na1 <sup>vii</sup>                 | 44.5 (2)   |
| F5—U1—Na1 <sup>iv</sup>                 | 123.10 (19) | O1 <sup>vii</sup> —Na1—Na1 <sup>vii</sup> | 42.0 (2)   |
| F3—U1—Na1 <sup>iv</sup>                 | 93.58 (16)  | F4 <sup>xi</sup> —Na1—Na1 <sup>vii</sup>  | 155.0 (3)  |
| F4—U1—Na1 <sup>iv</sup>                 | 69.43 (17)  | F1—Na1—U1 <sup>x</sup>                    | 147.0 (3)  |
| F4 <sup>ii</sup> —U1—Na1 <sup>iv</sup>  | 124.63 (16) | F3 <sup>vii</sup> —Na1—U1 <sup>x</sup>    | 36.90 (16) |
| F3 <sup>iii</sup> —U1—Na1 <sup>iv</sup> | 36.05 (15)  | F2 <sup>x</sup> —Na1—U1 <sup>x</sup>      | 35.03 (16) |
| F2 <sup>iii</sup> —U1—Na1 <sup>iv</sup> | 95.28 (16)  | O1—Na1—U1 <sup>x</sup>                    | 129.6 (3)  |
| F1—U1—Na1 <sup>v</sup>                  | 55.05 (16)  | O1 <sup>vii</sup> —Na1—U1 <sup>x</sup>    | 88.4 (2)   |
| F2—U1—Na1 <sup>v</sup>                  | 160.85 (16) | F4 <sup>xi</sup> —Na1—U1 <sup>x</sup>     | 72.64 (18) |
| F5 <sup>i</sup> —U1—Na1 <sup>v</sup>    | 97.07 (19)  | Na1 <sup>vii</sup> —Na1—U1 <sup>x</sup>   | 114.1 (2)  |
| F5—U1—Na1 <sup>v</sup>                  | 97.68 (18)  | F1—Na1—U1 <sup>v</sup>                    | 97.5 (2)   |
| F3—U1—Na1 <sup>v</sup>                  | 134.06 (18) | F3 <sup>vii</sup> —Na1—U1 <sup>v</sup>    | 97.0 (2)   |
| F4—U1—Na1 <sup>v</sup>                  | 98.93 (17)  | F2 <sup>x</sup> —Na1—U1 <sup>v</sup>      | 36.00 (16) |

|                                        |             |                                         |            |
|----------------------------------------|-------------|-----------------------------------------|------------|
| F4 <sup>ii</sup> —U1—Na1 <sup>v</sup>  | 37.27 (17)  | O1—Na1—U1 <sup>v</sup>                  | 146.0 (3)  |
| F3 <sup>iii</sup> —U1—Na1 <sup>v</sup> | 90.27 (16)  | O1 <sup>vii</sup> —Na1—U1 <sup>v</sup>  | 127.4 (3)  |
| F2 <sup>iii</sup> —U1—Na1 <sup>v</sup> | 34.54 (16)  | F4 <sup>xi</sup> —Na1—U1 <sup>v</sup>   | 35.48 (15) |
| Na1 <sup>iv</sup> —U1—Na1 <sup>v</sup> | 126.25 (12) | Na1 <sup>vii</sup> —Na1—U1 <sup>v</sup> | 169.3 (3)  |
| F1—U1—U1 <sup>ii</sup>                 | 107.2 (2)   | U1 <sup>x</sup> —Na1—U1 <sup>v</sup>    | 61.96 (8)  |
| F2—U1—U1 <sup>ii</sup>                 | 104.14 (16) | Na1—O1—Na1 <sup>vii</sup>               | 93.5 (3)   |

Symmetry codes: (i)  $x, -y+1/2, z-1/2$ ; (ii)  $-x+1, -y, -z+2$ ; (iii)  $-x+1, y-1/2, -z+3/2$ ; (iv)  $x-1, -y+1/2, z-1/2$ ; (v)  $-x+2, -y, -z+2$ ; (vi)  $-x+1, y+1/2, -z+3/2$ ; (vii)  $-x+2, -y+1, -z+2$ ; (viii)  $x-1, y, z$ ; (ix)  $x, -y+1/2, z+1/2$ ; (x)  $x+1, -y+1/2, z+1/2$ ; (xi)  $x+1, y, z$ .

All esds (except the esd in the dihedral angle between two l.s. planes) are estimated using the full covariance matrix. The cell esds are taken into account individually in the estimation of esds in distances, angles and torsion angles; correlations between esds in cell parameters are only used when they are defined by crystal symmetry. An approximate (isotropic) treatment of cell esds is used for estimating esds involving l.s. planes.

#### Hydrogen-bond geometry (Å, °)

| <i>D</i> —H $\cdots$ <i>A</i>    | <i>D</i> —H | H $\cdots$ <i>A</i> | <i>D</i> $\cdots$ <i>A</i> | <i>D</i> —H $\cdots$ <i>A</i> |
|----------------------------------|-------------|---------------------|----------------------------|-------------------------------|
| O1—H1 $\cdots$ F1 <sup>i</sup>   | 0.85 (2)    | 2.66 (3)            | 3.356 (12)                 | 140 (4)                       |
| O1—H1 $\cdots$ F4 <sup>vi</sup>  | 0.85 (2)    | 2.30 (4)            | 2.998 (11)                 | 139 (4)                       |
| O1—H2 $\cdots$ F1 <sup>xii</sup> | 0.86 (2)    | 2.16 (3)            | 2.884 (12)                 | 142 (5)                       |
| O1—H2 $\cdots$ F5 <sup>vii</sup> | 0.86 (2)    | 2.48 (4)            | 3.151 (11)                 | 136 (4)                       |
| O1—H1 $\cdots$ F1 <sup>i</sup>   | 0.85 (2)    | 2.66 (3)            | 3.356 (12)                 | 140 (4)                       |
| O1—H1 $\cdots$ F4 <sup>vi</sup>  | 0.85 (2)    | 2.30 (4)            | 2.998 (11)                 | 139 (4)                       |
| O1—H2 $\cdots$ F1 <sup>xii</sup> | 0.86 (2)    | 2.16 (3)            | 2.884 (12)                 | 142 (5)                       |
| O1—H2 $\cdots$ F5 <sup>vii</sup> | 0.86 (2)    | 2.48 (4)            | 3.151 (11)                 | 136 (4)                       |

Symmetry codes: (i)  $x, -y+1/2, z-1/2$ ; (vi)  $-x+1, y+1/2, -z+3/2$ ; (vii)  $-x+2, -y+1, -z+2$ ; (xii)  $-x+2, y+1/2, -z+3/2$ .

All e.s.d.'s (except the e.s.d. in the dihedral angle between two l.s. planes) are estimated using the full covariance matrix. The cell e.s.d.'s are taken into account individually in the estimation of e.s.d.'s in distances, angles and torsion angles; correlations between e.s.d.'s in cell parameters are only used when they are defined by crystal symmetry. An approximate (isotropic) treatment of cell e.s.d.'s is used for estimating e.s.d.'s involving l.s. planes.

## Atomic coordinates and structural information of Product 2 - $\beta$ -NaUF<sub>5</sub>

### Crystal data

|                                 |                                                  |
|---------------------------------|--------------------------------------------------|
| NaUF <sub>5</sub>               | Trigonal, <i>P</i> -3c1                          |
| <i>M</i> <sub>r</sub> = 1068.06 | <i>D</i> <sub>x</sub> = 6.276 Mg m <sup>-3</sup> |

|                                                                                        |                                                                                                                                                                                               |
|----------------------------------------------------------------------------------------|-----------------------------------------------------------------------------------------------------------------------------------------------------------------------------------------------|
| $a = 10.0029 (12) \text{ \AA}$                                                         | Mo $K\alpha$ radiation, $\lambda = 0.71073 \text{ \AA}$                                                                                                                                       |
| $c = 13.0457 (16) \text{ \AA}$                                                         | Cell parameters from 883 reflections                                                                                                                                                          |
| $V = 1130.4 (3) \text{ \AA}^3$                                                         | $\theta = 2.4\text{--}27.8^\circ$                                                                                                                                                             |
| $Z = 4$                                                                                | $\mu = 43.18 \text{ mm}^{-1}$                                                                                                                                                                 |
| $F(000) = 1776$                                                                        | $T = 120 \text{ K}$                                                                                                                                                                           |
| $R[F^2 > 2\sigma(F^2)] = 0.020$                                                        | Blocky green hexagon, emerald green                                                                                                                                                           |
| $wR(F^2) = 0.038$                                                                      | $0.07 \times 0.07 \times 0.05 \text{ mm}$                                                                                                                                                     |
| $w = 1/[\sigma^2(F_o^2) + (0.0023P)^2 + 17.4221P]$ ,<br>where $P = (F_o^2 + 2F_c^2)/3$ | $\Delta\rho_{\text{max}}$<br>=C:\Users\atche\Desktop\Fluorides\NaUF5<br>drafts\aaa_refine_diff_density_max 1.14 e<br>$\text{\AA}^{-3}$ , $\Delta\rho_{\text{min}} = -1.74 \text{ e \AA}^{-3}$ |

Fractional atomic coordinates and isotropic or equivalent isotropic displacement parameters ( $\text{\AA}^2$ )

|     | x           | y           | z           | $U_{\text{iso}}^*/U_{\text{eq}}$ | Occ. (<1) |
|-----|-------------|-------------|-------------|----------------------------------|-----------|
| U1  | 0.07583 (2) | 0.39943 (2) | 0.89893 (2) | 0.00251 (9)                      |           |
| Na1 | -0.3333     | 0.3333      | 0.8421 (3)  | 0.0086 (9)                       |           |
| Na2 | 0.0000      | 0.0000      | 0.7500      | 0.0246 (17)                      |           |
| Na3 | 0.0000      | 0.0000      | 1.0000      | 0.045 (3)                        |           |
| Na4 | 0.3289 (15) | 0.2861 (14) | 0.7907 (10) | 0.041 (3)                        | 0.3333    |
| F1  | -0.4140 (4) | 0.1165 (4)  | 0.9466 (3)  | 0.0070 (7)                       |           |
| F2  | -0.1224 (4) | 0.1896 (4)  | 0.9777 (3)  | 0.0088 (7)                       |           |
| F3  | -0.1318 (4) | 0.3091 (5)  | 0.7833 (3)  | 0.0106 (8)                       |           |
| F4  | 0.0895 (5)  | 0.2007 (5)  | 0.8406 (3)  | 0.0184 (9)                       |           |
| F5  | 0.3417 (4)  | 0.5116 (4)  | 0.8631 (3)  | 0.0109 (8)                       |           |

Atomic displacement parameters ( $\text{\AA}^2$ )

|     | $U^{11}$     | $U^{22}$     | $U^{33}$     | $U^{12}$    | $U^{13}$     | $U^{23}$     |
|-----|--------------|--------------|--------------|-------------|--------------|--------------|
| U1  | 0.00250 (12) | 0.00270 (12) | 0.00201 (12) | 0.00107 (9) | -0.00019 (7) | -0.00013 (7) |
| Na1 | 0.0081 (13)  | 0.0081 (13)  | 0.010 (2)    | 0.0041 (7)  | 0.000        | 0.000        |
| Na2 | 0.024 (3)    | 0.024 (3)    | 0.026 (4)    | 0.0118 (13) | 0.000        | 0.000        |
| Na3 | 0.024 (3)    | 0.024 (3)    | 0.088 (8)    | 0.0118 (15) | 0.000        | 0.000        |
| Na4 | 0.038 (7)    | 0.036 (6)    | 0.063 (8)    | 0.028 (6)   | -0.001 (6)   | -0.015 (6)   |
| F1  | 0.0057 (17)  | 0.0055 (17)  | 0.0084 (16)  | 0.0017 (15) | -0.0012 (14) | 0.0018 (13)  |
| F2  | 0.0081 (17)  | 0.0058 (17)  | 0.0119 (17)  | 0.0031 (15) | 0.0012 (14)  | 0.0020 (14)  |
| F3  | 0.0076 (18)  | 0.021 (2)    | 0.0038 (17)  | 0.0073 (16) | -0.0006 (14) | -0.0005 (15) |

|    |             |             |             |             |              |              |
|----|-------------|-------------|-------------|-------------|--------------|--------------|
| F4 | 0.026 (2)   | 0.015 (2)   | 0.017 (2)   | 0.0125 (19) | -0.0078 (18) | -0.0040 (17) |
| F5 | 0.0041 (17) | 0.0105 (19) | 0.0147 (18) | 0.0012 (15) | -0.0009 (14) | 0.0040 (15)  |

Geometric parameters (Å, °)

|                         |             |                         |            |
|-------------------------|-------------|-------------------------|------------|
| U1—F4                   | 2.196 (4)   | Na2—Na4                 | 3.143 (13) |
| U1—F2                   | 2.287 (4)   | Na3—F4 <sup>ii</sup>    | 2.713 (4)  |
| U1—F5 <sup>i</sup>      | 2.318 (4)   | Na3—F4 <sup>vii</sup>   | 2.713 (4)  |
| U1—F1 <sup>ii</sup>     | 2.326 (3)   | Na3—F4 <sup>xi</sup>    | 2.713 (4)  |
| U1—F3                   | 2.351 (4)   | Na3—F4 <sup>x</sup>     | 2.713 (4)  |
| U1—F5                   | 2.359 (4)   | Na3—F4 <sup>xii</sup>   | 2.713 (4)  |
| U1—F2 <sup>ii</sup>     | 2.376 (4)   | Na3—F4                  | 2.713 (4)  |
| U1—F3 <sup>iii</sup>    | 2.430 (4)   | Na3—F2 <sup>xii</sup>   | 2.739 (4)  |
| U1—F1 <sup>iv</sup>     | 2.435 (4)   | Na3—F2                  | 2.739 (4)  |
| U1—Na4 <sup>v</sup>     | 3.539 (12)  | Na3—F2 <sup>ii</sup>    | 2.739 (4)  |
| U1—Na4                  | 3.543 (11)  | Na3—F2 <sup>vii</sup>   | 2.739 (4)  |
| U1—Na4 <sup>i</sup>     | 3.743 (12)  | Na3—F2 <sup>xi</sup>    | 2.739 (4)  |
| Na1—F3                  | 2.281 (4)   | Na3—F2 <sup>x</sup>     | 2.739 (4)  |
| Na1—F3 <sup>vi</sup>    | 2.281 (4)   | Na4—Na4 <sup>v</sup>    | 1.29 (3)   |
| Na1—F3 <sup>iv</sup>    | 2.281 (4)   | Na4—F4                  | 2.200 (13) |
| Na1—F1 <sup>iv</sup>    | 2.337 (4)   | Na4—F3 <sup>x</sup>     | 2.319 (12) |
| Na1—F1                  | 2.337 (4)   | Na4—F5                  | 2.389 (12) |
| Na1—F1 <sup>vi</sup>    | 2.338 (4)   | Na4—F4 <sup>v</sup>     | 2.434 (13) |
| Na1—Na4 <sup>vii</sup>  | 3.240 (12)  | Na4—F5 <sup>v</sup>     | 2.580 (14) |
| Na1—Na4 <sup>i</sup>    | 3.240 (12)  | Na4—F1 <sup>x</sup>     | 2.695 (13) |
| Na1—Na4 <sup>viii</sup> | 3.240 (12)  | Na4—F2 <sup>x</sup>     | 2.896 (14) |
| Na1—U1 <sup>vi</sup>    | 3.8771 (10) | Na4—Na1 <sup>xiii</sup> | 3.240 (12) |
| Na1—U1 <sup>iv</sup>    | 3.8771 (10) | Na4—U1 <sup>v</sup>     | 3.539 (12) |
| Na2—F4                  | 2.105 (4)   | F1—U1 <sup>xi</sup>     | 2.326 (3)  |
| Na2—F4 <sup>ix</sup>    | 2.105 (4)   | F1—U1 <sup>vi</sup>     | 2.435 (4)  |
| Na2—F4 <sup>x</sup>     | 2.105 (4)   | F1—Na4 <sup>vii</sup>   | 2.695 (13) |
| Na2—F4 <sup>iii</sup>   | 2.105 (4)   | F2—U1 <sup>xi</sup>     | 2.376 (4)  |
| Na2—F4 <sup>vii</sup>   | 2.105 (4)   | F2—Na4 <sup>vii</sup>   | 2.896 (14) |
| Na2—F4 <sup>v</sup>     | 2.105 (4)   | F3—Na4 <sup>vii</sup>   | 2.319 (12) |
| Na2—Na4 <sup>v</sup>    | 3.143 (13)  | F3—U1 <sup>iii</sup>    | 2.430 (4)  |
| Na2—Na4 <sup>iii</sup>  | 3.143 (13)  | F4—Na4 <sup>v</sup>     | 2.434 (13) |
| Na2—Na4 <sup>ix</sup>   | 3.143 (13)  | F5—U1 <sup>xiv</sup>    | 2.318 (4)  |

|                                                                             |             |                                                                               |             |
|-----------------------------------------------------------------------------|-------------|-------------------------------------------------------------------------------|-------------|
| Na <sub>2</sub> —Na <sup>4x</sup>                                           | 3.143 (13)  | F <sub>5</sub> —Na <sup>4v</sup>                                              | 2.580 (14)  |
| Na <sub>2</sub> —Na <sup>4vii</sup>                                         | 3.143 (13)  |                                                                               |             |
| F <sub>4</sub> —U <sub>1</sub> —F <sub>2</sub>                              | 75.09 (15)  | F <sub>4</sub> <sup>v</sup> —Na <sub>2</sub> —Na <sup>4vii</sup>              | 140.9 (2)   |
| F <sub>4</sub> —U <sub>1</sub> —F <sub>5</sub> <sup>i</sup>                 | 140.11 (15) | Na <sup>4v</sup> —Na <sub>2</sub> —Na <sup>4vii</sup>                         | 107.5 (4)   |
| F <sub>2</sub> —U <sub>1</sub> —F <sub>5</sub> <sup>i</sup>                 | 142.87 (13) | Na <sup>4iii</sup> —Na <sub>2</sub> —Na <sup>4vii</sup>                       | 23.7 (5)    |
| F <sub>4</sub> —U <sub>1</sub> —F <sub>1</sub> <sup>ii</sup>                | 137.54 (13) | Na <sup>4ix</sup> —Na <sub>2</sub> —Na <sup>4vii</sup>                        | 134.4 (4)   |
| F <sub>2</sub> —U <sub>1</sub> —F <sub>1</sub> <sup>ii</sup>                | 87.43 (13)  | Na <sup>4x</sup> —Na <sub>2</sub> —Na <sup>4vii</sup>                         | 117.21 (14) |
| F <sub>5</sub> <sup>i</sup> —U <sub>1</sub> —F <sub>1</sub> <sup>ii</sup>   | 71.71 (13)  | F <sub>4</sub> —Na <sub>2</sub> —Na <sub>4</sub>                              | 44.3 (2)    |
| F <sub>4</sub> —U <sub>1</sub> —F <sub>3</sub>                              | 82.68 (15)  | F <sub>4</sub> <sup>ix</sup> —Na <sub>2</sub> —Na <sub>4</sub>                | 140.9 (2)   |
| F <sub>2</sub> —U <sub>1</sub> —F <sub>3</sub>                              | 75.03 (13)  | F <sub>4</sub> <sup>x</sup> —Na <sub>2</sub> —Na <sub>4</sub>                 | 76.0 (3)    |
| F <sub>5</sub> <sup>i</sup> —U <sub>1</sub> —F <sub>3</sub>                 | 95.01 (14)  | F <sub>4</sub> <sup>iii</sup> —Na <sub>2</sub> —Na <sub>4</sub>               | 98.1 (3)    |
| F <sub>1</sub> <sup>ii</sup> —U <sub>1</sub> —F <sub>3</sub>                | 130.12 (13) | F <sub>4</sub> <sup>vii</sup> —Na <sub>2</sub> —Na <sub>4</sub>               | 132.3 (3)   |
| F <sub>4</sub> —U <sub>1</sub> —F <sub>5</sub>                              | 78.23 (16)  | F <sub>4</sub> <sup>v</sup> —Na <sub>2</sub> —Na <sub>4</sub>                 | 50.7 (3)    |
| F <sub>2</sub> —U <sub>1</sub> —F <sub>5</sub>                              | 141.18 (13) | Na <sup>4v</sup> —Na <sub>2</sub> —Na <sub>4</sub>                            | 23.7 (5)    |
| F <sub>5</sub> <sup>i</sup> —U <sub>1</sub> —F <sub>5</sub>                 | 72.39 (19)  | Na <sup>4iii</sup> —Na <sub>2</sub> —Na <sub>4</sub>                          | 134.4 (4)   |
| F <sub>1</sub> <sup>ii</sup> —U <sub>1</sub> —F <sub>5</sub>                | 93.76 (13)  | Na <sup>4ix</sup> —Na <sub>2</sub> —Na <sub>4</sub>                           | 107.5 (4)   |
| F <sub>3</sub> —U <sub>1</sub> —F <sub>5</sub>                              | 128.66 (13) | Na <sup>4x</sup> —Na <sub>2</sub> —Na <sub>4</sub>                            | 117.21 (14) |
| F <sub>4</sub> —U <sub>1</sub> —F <sub>2</sub> <sup>ii</sup>                | 69.09 (14)  | Na <sup>4vii</sup> —Na <sub>2</sub> —Na <sub>4</sub>                          | 117.21 (14) |
| F <sub>2</sub> —U <sub>1</sub> —F <sub>2</sub> <sup>ii</sup>                | 73.30 (14)  | F <sub>4</sub> <sup>ii</sup> —Na <sub>3</sub> —F <sub>4</sub> <sup>vii</sup>  | 180.0       |
| F <sub>5</sub> <sup>i</sup> —U <sub>1</sub> —F <sub>2</sub> <sup>ii</sup>   | 123.12 (14) | F <sub>4</sub> <sup>ii</sup> —Na <sub>3</sub> —F <sub>4</sub> <sup>xi</sup>   | 67.58 (14)  |
| F <sub>1</sub> <sup>ii</sup> —U <sub>1</sub> —F <sub>2</sub> <sup>ii</sup>  | 68.88 (12)  | F <sub>4</sub> <sup>vii</sup> —Na <sub>3</sub> —F <sub>4</sub> <sup>xi</sup>  | 112.42 (14) |
| F <sub>3</sub> —U <sub>1</sub> —F <sub>2</sub> <sup>ii</sup>                | 141.86 (14) | F <sub>4</sub> <sup>ii</sup> —Na <sub>3</sub> —F <sub>4</sub> <sup>x</sup>    | 112.42 (14) |
| F <sub>5</sub> —U <sub>1</sub> —F <sub>2</sub> <sup>ii</sup>                | 71.09 (13)  | F <sub>4</sub> <sup>vii</sup> —Na <sub>3</sub> —F <sub>4</sub> <sup>x</sup>   | 67.58 (14)  |
| F <sub>4</sub> —U <sub>1</sub> —F <sub>3</sub> <sup>iii</sup>               | 72.67 (14)  | F <sub>4</sub> <sup>xi</sup> —Na <sub>3</sub> —F <sub>4</sub> <sup>x</sup>    | 180.0       |
| F <sub>2</sub> —U <sub>1</sub> —F <sub>3</sub> <sup>iii</sup>               | 128.02 (13) | F <sub>4</sub> <sup>ii</sup> —Na <sub>3</sub> —F <sub>4</sub> <sup>xii</sup>  | 67.58 (14)  |
| F <sub>5</sub> <sup>i</sup> —U <sub>1</sub> —F <sub>3</sub> <sup>iii</sup>  | 71.46 (13)  | F <sub>4</sub> <sup>vii</sup> —Na <sub>3</sub> —F <sub>4</sub> <sup>xii</sup> | 112.42 (14) |
| F <sub>1</sub> <sup>ii</sup> —U <sub>1</sub> —F <sub>3</sub> <sup>iii</sup> | 142.28 (13) | F <sub>4</sub> <sup>xi</sup> —Na <sub>3</sub> —F <sub>4</sub> <sup>xii</sup>  | 67.58 (14)  |
| F <sub>3</sub> —U <sub>1</sub> —F <sub>3</sub> <sup>iii</sup>               | 61.42 (16)  | F <sub>4</sub> <sup>x</sup> —Na <sub>3</sub> —F <sub>4</sub> <sup>xii</sup>   | 112.42 (14) |
| F <sub>5</sub> —U <sub>1</sub> —F <sub>3</sub> <sup>iii</sup>               | 67.45 (13)  | F <sub>4</sub> <sup>ii</sup> —Na <sub>3</sub> —F <sub>4</sub>                 | 112.42 (14) |
| F <sub>2</sub> <sup>ii</sup> —U <sub>1</sub> —F <sub>3</sub> <sup>iii</sup> | 127.86 (13) | F <sub>4</sub> <sup>vii</sup> —Na <sub>3</sub> —F <sub>4</sub>                | 67.58 (14)  |
| F <sub>4</sub> —U <sub>1</sub> —F <sub>1</sub> <sup>iv</sup>                | 139.92 (15) | F <sub>4</sub> <sup>xi</sup> —Na <sub>3</sub> —F <sub>4</sub>                 | 112.42 (14) |
| F <sub>2</sub> —U <sub>1</sub> —F <sub>1</sub> <sup>iv</sup>                | 72.68 (13)  | F <sub>4</sub> <sup>x</sup> —Na <sub>3</sub> —F <sub>4</sub>                  | 67.58 (14)  |
| F <sub>5</sub> <sup>i</sup> —U <sub>1</sub> —F <sub>1</sub> <sup>iv</sup>   | 70.59 (13)  | F <sub>4</sub> <sup>xii</sup> —Na <sub>3</sub> —F <sub>4</sub>                | 180.00 (11) |
| F <sub>1</sub> <sup>ii</sup> —U <sub>1</sub> —F <sub>1</sub> <sup>iv</sup>  | 63.72 (14)  | F <sub>4</sub> <sup>ii</sup> —Na <sub>3</sub> —F <sub>2</sub> <sup>xii</sup>  | 72.96 (12)  |
| F <sub>3</sub> —U <sub>1</sub> —F <sub>1</sub> <sup>iv</sup>                | 66.51 (12)  | F <sub>4</sub> <sup>vii</sup> —Na <sub>3</sub> —F <sub>2</sub> <sup>xii</sup> | 107.04 (12) |

|                                        |             |                                          |             |
|----------------------------------------|-------------|------------------------------------------|-------------|
| F5—U1—F1 <sup>iv</sup>                 | 141.15 (13) | F4 <sup>xi</sup> —Na3—F2 <sup>xii</sup>  | 123.10 (11) |
| F2 <sup>ii</sup> —U1—F1 <sup>iv</sup>  | 121.72 (12) | F4 <sup>x</sup> —Na3—F2 <sup>xii</sup>   | 56.90 (11)  |
| F3 <sup>iii</sup> —U1—F1 <sup>iv</sup> | 110.40 (12) | F4 <sup>xii</sup> —Na3—F2 <sup>xii</sup> | 60.17 (12)  |
| F4—U1—Na4 <sup>v</sup>                 | 42.7 (2)    | F4—Na3—F2 <sup>xii</sup>                 | 119.82 (12) |
| F2—U1—Na4 <sup>v</sup>                 | 117.4 (2)   | F4 <sup>ii</sup> —Na3—F2                 | 107.04 (12) |
| F5 <sup>i</sup> —U1—Na4 <sup>v</sup>   | 97.6 (2)    | F4 <sup>vii</sup> —Na3—F2                | 72.96 (12)  |
| F1 <sup>ii</sup> —U1—Na4 <sup>v</sup>  | 139.8 (2)   | F4 <sup>xi</sup> —Na3—F2                 | 56.90 (11)  |
| F3—U1—Na4 <sup>v</sup>                 | 88.5 (2)    | F4 <sup>x</sup> —Na3—F2                  | 123.10 (11) |
| F5—U1—Na4 <sup>v</sup>                 | 46.8 (2)    | F4 <sup>xii</sup> —Na3—F2                | 119.82 (12) |
| F2 <sup>ii</sup> —U1—Na4 <sup>v</sup>  | 87.6 (2)    | F4—Na3—F2                                | 60.18 (12)  |
| F3 <sup>iii</sup> —U1—Na4 <sup>v</sup> | 40.6 (2)    | F2 <sup>xii</sup> —Na3—F2                | 180.0       |
| F1 <sup>iv</sup> —U1—Na4 <sup>v</sup>  | 150.5 (2)   | F4 <sup>ii</sup> —Na3—F2 <sup>ii</sup>   | 60.18 (12)  |
| F4—U1—Na4                              | 36.3 (2)    | F4 <sup>vii</sup> —Na3—F2 <sup>ii</sup>  | 119.82 (12) |
| F2—U1—Na4                              | 108.4 (2)   | F4 <sup>xi</sup> —Na3—F2 <sup>ii</sup>   | 72.95 (12)  |
| F5 <sup>i</sup> —U1—Na4                | 108.7 (2)   | F4 <sup>x</sup> —Na3—F2 <sup>ii</sup>    | 107.05 (12) |
| F1 <sup>ii</sup> —U1—Na4               | 125.0 (2)   | F4 <sup>xii</sup> —Na3—F2 <sup>ii</sup>  | 123.10 (11) |
| F3—U1—Na4                              | 104.8 (2)   | F4—Na3—F2 <sup>ii</sup>                  | 56.90 (11)  |
| F5—U1—Na4                              | 42.1 (2)    | F2 <sup>xii</sup> —Na3—F2 <sup>ii</sup>  | 118.89 (3)  |
| F2 <sup>ii</sup> —U1—Na4               | 66.6 (2)    | F2—Na3—F2 <sup>ii</sup>                  | 61.11 (3)   |
| F3 <sup>iii</sup> —U1—Na4              | 61.6 (2)    | F4 <sup>ii</sup> —Na3—F2 <sup>vii</sup>  | 119.82 (12) |
| F1 <sup>iv</sup> —U1—Na4               | 171.0 (2)   | F4 <sup>vii</sup> —Na3—F2 <sup>vii</sup> | 60.18 (12)  |
| Na4 <sup>v</sup> —U1—Na4               | 21.0 (4)    | F4 <sup>xi</sup> —Na3—F2 <sup>vii</sup>  | 107.05 (12) |
| F4—U1—Na4 <sup>i</sup>                 | 135.4 (2)   | F4 <sup>x</sup> —Na3—F2 <sup>vii</sup>   | 72.95 (12)  |
| F2—U1—Na4 <sup>i</sup>                 | 113.1 (2)   | F4 <sup>xii</sup> —Na3—F2 <sup>vii</sup> | 56.90 (11)  |
| F5 <sup>i</sup> —U1—Na4 <sup>i</sup>   | 38.0 (2)    | F4—Na3—F2 <sup>vii</sup>                 | 123.10 (11) |
| F1 <sup>ii</sup> —U1—Na4 <sup>i</sup>  | 87.0 (2)    | F2 <sup>xii</sup> —Na3—F2 <sup>vii</sup> | 61.11 (3)   |
| F3—U1—Na4 <sup>i</sup>                 | 59.8 (2)    | F2—Na3—F2 <sup>vii</sup>                 | 118.89 (3)  |
| F5—U1—Na4 <sup>i</sup>                 | 105.7 (2)   | F2 <sup>ii</sup> —Na3—F2 <sup>vii</sup>  | 180.0       |
| F2 <sup>ii</sup> —U1—Na4 <sup>i</sup>  | 155.1 (2)   | F4 <sup>ii</sup> —Na3—F2 <sup>xi</sup>   | 123.10 (11) |
| F3 <sup>iii</sup> —U1—Na4 <sup>i</sup> | 68.7 (2)    | F4 <sup>vii</sup> —Na3—F2 <sup>xi</sup>  | 56.90 (11)  |
| F1 <sup>iv</sup> —U1—Na4 <sup>i</sup>  | 45.9 (2)    | F4 <sup>xi</sup> —Na3—F2 <sup>xi</sup>   | 60.17 (12)  |
| Na4 <sup>v</sup> —U1—Na4 <sup>i</sup>  | 108.47 (13) | F4 <sup>x</sup> —Na3—F2 <sup>xi</sup>    | 119.83 (12) |
| Na4—U1—Na4 <sup>i</sup>                | 128.2 (4)   | F4 <sup>xii</sup> —Na3—F2 <sup>xi</sup>  | 72.96 (12)  |
| F3—Na1—F3 <sup>vi</sup>                | 109.29 (14) | F4—Na3—F2 <sup>xi</sup>                  | 107.04 (12) |
| F3—Na1—F3 <sup>iv</sup>                | 109.29 (14) | F2 <sup>xii</sup> —Na3—F2 <sup>xi</sup>  | 118.89 (3)  |

|                                             |             |                                         |             |
|---------------------------------------------|-------------|-----------------------------------------|-------------|
| F3 <sup>vi</sup> —Na1—F3 <sup>iv</sup>      | 109.29 (14) | F2—Na3—F2 <sup>xi</sup>                 | 61.11 (3)   |
| F3—Na1—F1 <sup>iv</sup>                     | 69.27 (13)  | F2 <sup>ii</sup> —Na3—F2 <sup>xi</sup>  | 118.88 (3)  |
| F3 <sup>vi</sup> —Na1—F1 <sup>iv</sup>      | 158.69 (19) | F2 <sup>vii</sup> —Na3—F2 <sup>xi</sup> | 61.12 (3)   |
| F3 <sup>iv</sup> —Na1—F1 <sup>iv</sup>      | 90.62 (14)  | F4 <sup>ii</sup> —Na3—F2 <sup>x</sup>   | 56.90 (11)  |
| F3—Na1—F1                                   | 90.62 (14)  | F4 <sup>vii</sup> —Na3—F2 <sup>x</sup>  | 123.10 (11) |
| F3 <sup>vi</sup> —Na1—F1                    | 69.27 (13)  | F4 <sup>xi</sup> —Na3—F2 <sup>x</sup>   | 119.83 (12) |
| F3 <sup>iv</sup> —Na1—F1                    | 158.68 (19) | F4 <sup>x</sup> —Na3—F2 <sup>x</sup>    | 60.17 (12)  |
| F1 <sup>iv</sup> —Na1—F1                    | 89.41 (17)  | F4 <sup>xii</sup> —Na3—F2 <sup>x</sup>  | 107.04 (12) |
| F3—Na1—F1 <sup>vi</sup>                     | 158.69 (19) | F4—Na3—F2 <sup>x</sup>                  | 72.96 (12)  |
| F3 <sup>vi</sup> —Na1—F1 <sup>vi</sup>      | 90.62 (14)  | F2 <sup>xii</sup> —Na3—F2 <sup>x</sup>  | 61.11 (3)   |
| F3 <sup>iv</sup> —Na1—F1 <sup>vi</sup>      | 69.27 (13)  | F2—Na3—F2 <sup>x</sup>                  | 118.89 (3)  |
| F1 <sup>iv</sup> —Na1—F1 <sup>vi</sup>      | 89.41 (17)  | F2 <sup>ii</sup> —Na3—F2 <sup>x</sup>   | 61.12 (3)   |
| F1—Na1—F1 <sup>vi</sup>                     | 89.41 (17)  | F2 <sup>vii</sup> —Na3—F2 <sup>x</sup>  | 118.88 (3)  |
| F3—Na1—Na4 <sup>vii</sup>                   | 45.7 (2)    | F2 <sup>xi</sup> —Na3—F2 <sup>x</sup>   | 180.0       |
| F3 <sup>vi</sup> —Na1—Na4 <sup>vii</sup>    | 70.2 (2)    | Na4 <sup>v</sup> —Na4—F4                | 84.1 (7)    |
| F3 <sup>iv</sup> —Na1—Na4 <sup>vii</sup>    | 145.9 (3)   | Na4 <sup>v</sup> —Na4—F3 <sup>x</sup>   | 122.4 (12)  |
| F1 <sup>iv</sup> —Na1—Na4 <sup>vii</sup>    | 97.7 (3)    | F4—Na4—F3 <sup>x</sup>                  | 123.2 (6)   |
| F1—Na1—Na4 <sup>vii</sup>                   | 55.0 (2)    | Na4 <sup>v</sup> —Na4—F5                | 83.3 (9)    |
| F1 <sup>vi</sup> —Na1—Na4 <sup>vii</sup>    | 143.3 (2)   | F4—Na4—F5                               | 77.5 (4)    |
| F3—Na1—Na4 <sup>i</sup>                     | 70.2 (2)    | F3 <sup>x</sup> —Na4—F5                 | 146.0 (6)   |
| F3 <sup>vi</sup> —Na1—Na4 <sup>i</sup>      | 145.9 (3)   | Na4 <sup>v</sup> —Na4—F4 <sup>v</sup>   | 64.0 (7)    |
| F3 <sup>iv</sup> —Na1—Na4 <sup>i</sup>      | 45.7 (2)    | F4—Na4—F4 <sup>v</sup>                  | 82.1 (5)    |
| F1 <sup>iv</sup> —Na1—Na4 <sup>i</sup>      | 55.0 (2)    | F3 <sup>x</sup> —Na4—F4 <sup>v</sup>    | 70.6 (3)    |
| F1—Na1—Na4 <sup>i</sup>                     | 143.3 (2)   | F5—Na4—F4 <sup>v</sup>                  | 143.1 (6)   |
| F1 <sup>vi</sup> —Na1—Na4 <sup>i</sup>      | 97.7 (3)    | Na4 <sup>v</sup> —Na4—F5 <sup>v</sup>   | 66.8 (9)    |
| Na4 <sup>vii</sup> —Na1—Na4 <sup>i</sup>    | 115.83 (17) | F4—Na4—F5 <sup>v</sup>                  | 146.1 (6)   |
| F3—Na1—Na4 <sup>viii</sup>                  | 145.9 (3)   | F3 <sup>x</sup> —Na4—F5 <sup>v</sup>    | 65.5 (3)    |
| F3 <sup>vi</sup> —Na1—Na4 <sup>viii</sup>   | 45.7 (2)    | F5—Na4—F5 <sup>v</sup>                  | 114.0 (5)   |
| F3 <sup>iv</sup> —Na1—Na4 <sup>viii</sup>   | 70.2 (2)    | F4 <sup>v</sup> —Na4—F5 <sup>v</sup>    | 69.9 (4)    |
| F1 <sup>iv</sup> —Na1—Na4 <sup>viii</sup>   | 143.3 (2)   | Na4 <sup>v</sup> —Na4—F1 <sup>x</sup>   | 139.0 (5)   |
| F1—Na1—Na4 <sup>viii</sup>                  | 97.7 (3)    | F4—Na4—F1 <sup>x</sup>                  | 111.8 (5)   |
| F1 <sup>vi</sup> —Na1—Na4 <sup>viii</sup>   | 55.0 (2)    | F3 <sup>x</sup> —Na4—F1 <sup>x</sup>    | 81.4 (4)    |
| Na4 <sup>vii</sup> —Na1—Na4 <sup>viii</sup> | 115.83 (17) | F5—Na4—F1 <sup>x</sup>                  | 65.1 (3)    |
| Na4 <sup>i</sup> —Na1—Na4 <sup>viii</sup>   | 115.83 (17) | F4 <sup>v</sup> —Na4—F1 <sup>x</sup>    | 151.8 (5)   |
| F3—Na1—U1 <sup>vi</sup>                     | 108.36 (10) | F5 <sup>v</sup> —Na4—F1 <sup>x</sup>    | 101.7 (4)   |

|                                           |             |                                           |            |
|-------------------------------------------|-------------|-------------------------------------------|------------|
| F3 <sup>vi</sup> —Na1—U1 <sup>vi</sup>    | 33.74 (10)  | Na4 <sup>v</sup> —Na4—F2 <sup>x</sup>     | 160.4 (5)  |
| F3 <sup>iv</sup> —Na1—U1 <sup>vi</sup>    | 135.20 (11) | F4—Na4—F2 <sup>x</sup>                    | 77.7 (4)   |
| F1 <sup>iv</sup> —Na1—U1 <sup>vi</sup>    | 125.26 (15) | F3 <sup>x</sup> —Na4—F2 <sup>x</sup>      | 64.5 (3)   |
| F1—Na1—U1 <sup>vi</sup>                   | 36.52 (9)   | F5—Na4—F2 <sup>x</sup>                    | 99.3 (5)   |
| F1 <sup>vi</sup> —Na1—U1 <sup>vi</sup>    | 83.79 (10)  | F4 <sup>v</sup> —Na4—F2 <sup>x</sup>      | 106.1 (4)  |
| Na4 <sup>vii</sup> —Na1—U1 <sup>vi</sup>  | 62.7 (2)    | F5 <sup>v</sup> —Na4—F2 <sup>x</sup>      | 127.7 (8)  |
| Na4 <sup>i</sup> —Na1—U1 <sup>vi</sup>    | 178.5 (3)   | F1 <sup>x</sup> —Na4—F2 <sup>x</sup>      | 56.7 (3)   |
| Na4 <sup>viii</sup> —Na1—U1 <sup>vi</sup> | 65.0 (2)    | Na4 <sup>v</sup> —Na4—Na2                 | 78.1 (2)   |
| F3—Na1—U1                                 | 33.74 (10)  | F4—Na4—Na2                                | 41.9 (2)   |
| F3 <sup>vi</sup> —Na1—U1                  | 135.20 (11) | F3 <sup>x</sup> —Na4—Na2                  | 91.2 (4)   |
| F3 <sup>iv</sup> —Na1—U1                  | 108.36 (10) | F5—Na4—Na2                                | 117.7 (4)  |
| F1 <sup>iv</sup> —Na1—U1                  | 36.52 (9)   | F4 <sup>v</sup> —Na4—Na2                  | 42.0 (2)   |
| F1—Na1—U1                                 | 83.79 (10)  | F5 <sup>v</sup> —Na4—Na2                  | 111.8 (4)  |
| F1 <sup>vi</sup> —Na1—U1                  | 125.26 (15) | F1 <sup>x</sup> —Na4—Na2                  | 138.9 (5)  |
| Na4 <sup>vii</sup> —Na1—U1                | 65.0 (2)    | F2 <sup>x</sup> —Na4—Na2                  | 83.6 (3)   |
| Na4 <sup>i</sup> —Na1—U1                  | 62.7 (2)    | Na4 <sup>v</sup> —Na4—Na1 <sup>xiii</sup> | 127.9 (8)  |
| Na4 <sup>viii</sup> —Na1—U1               | 178.5 (3)   | F4—Na4—Na1 <sup>xiii</sup>                | 148.0 (6)  |
| U1 <sup>vi</sup> —Na1—U1                  | 116.43 (4)  | F3 <sup>x</sup> —Na4—Na1 <sup>xiii</sup>  | 44.7 (2)   |
| F3—Na1—U1 <sup>iv</sup>                   | 135.20 (11) | F5—Na4—Na1 <sup>xiii</sup>                | 102.7 (4)  |
| F3 <sup>vi</sup> —Na1—U1 <sup>iv</sup>    | 108.36 (10) | F4 <sup>v</sup> —Na4—Na1 <sup>xiii</sup>  | 110.7 (4)  |
| F3 <sup>iv</sup> —Na1—U1 <sup>iv</sup>    | 33.74 (10)  | F5 <sup>v</sup> —Na4—Na1 <sup>xiii</sup>  | 63.6 (3)   |
| F1 <sup>iv</sup> —Na1—U1 <sup>iv</sup>    | 83.79 (10)  | F1 <sup>x</sup> —Na4—Na1 <sup>xiii</sup>  | 45.2 (2)   |
| F1—Na1—U1 <sup>iv</sup>                   | 125.26 (15) | F2 <sup>x</sup> —Na4—Na1 <sup>xiii</sup>  | 70.7 (3)   |
| F1 <sup>vi</sup> —Na1—U1 <sup>iv</sup>    | 36.51 (9)   | Na2—Na4—Na1 <sup>xiii</sup>               | 135.1 (4)  |
| Na4 <sup>vii</sup> —Na1—U1 <sup>iv</sup>  | 178.5 (3)   | Na4 <sup>v</sup> —Na4—U1 <sup>v</sup>     | 79.6 (10)  |
| Na4 <sup>i</sup> —Na1—U1 <sup>iv</sup>    | 65.0 (2)    | F4—Na4—U1 <sup>v</sup>                    | 118.5 (5)  |
| Na4 <sup>viii</sup> —Na1—U1 <sup>iv</sup> | 62.7 (2)    | F3 <sup>x</sup> —Na4—U1 <sup>v</sup>      | 43.0 (2)   |
| U1 <sup>vi</sup> —Na1—U1 <sup>iv</sup>    | 116.43 (4)  | F5—Na4—U1 <sup>v</sup>                    | 154.8 (5)  |
| U1—Na1—U1 <sup>iv</sup>                   | 116.43 (4)  | F4 <sup>v</sup> —Na4—U1 <sup>v</sup>      | 37.72 (19) |
| F4—Na2—F4 <sup>ix</sup>                   | 174.1 (2)   | F5 <sup>v</sup> —Na4—U1 <sup>v</sup>      | 41.79 (19) |
| F4—Na2—F4 <sup>x</sup>                    | 91.55 (16)  | F1 <sup>x</sup> —Na4—U1 <sup>v</sup>      | 119.0 (4)  |
| F4 <sup>ix</sup> —Na2—F4 <sup>x</sup>     | 92.8 (2)    | F2 <sup>x</sup> —Na4—U1 <sup>v</sup>      | 103.0 (3)  |
| F4—Na2—F4 <sup>iii</sup>                  | 84.4 (2)    | Na2—Na4—U1 <sup>v</sup>                   | 76.7 (3)   |
| F4 <sup>ix</sup> —Na2—F4 <sup>iii</sup>   | 91.55 (16)  | Na1 <sup>xiii</sup> —Na4—U1 <sup>v</sup>  | 74.2 (2)   |
| F4 <sup>x</sup> —Na2—F4 <sup>iii</sup>    | 174.1 (3)   | Na4 <sup>v</sup> —Na4—U1                  | 79.3 (9)   |



|                                           |             |                                          |             |
|-------------------------------------------|-------------|------------------------------------------|-------------|
| F4—Na2—F4 <sup>vii</sup>                  | 91.55 (16)  | F4—Na4—U1                                | 36.3 (2)    |
| F4 <sup>ix</sup> —Na2—F4 <sup>vii</sup>   | 84.4 (2)    | F3 <sup>x</sup> —Na4—U1                  | 152.8 (6)   |
| F4 <sup>x</sup> —Na2—F4 <sup>vii</sup>    | 91.55 (16)  | F5—Na4—U1                                | 41.4 (2)    |
| F4 <sup>iii</sup> —Na2—F4 <sup>vii</sup>  | 92.8 (3)    | F4 <sup>v</sup> —Na4—U1                  | 111.5 (4)   |
| F4—Na2—F4 <sup>v</sup>                    | 92.8 (3)    | F5 <sup>v</sup> —Na4—U1                  | 141.6 (5)   |
| F4 <sup>ix</sup> —Na2—F4 <sup>v</sup>     | 91.55 (16)  | F1 <sup>x</sup> —Na4—U1                  | 91.8 (3)    |
| F4 <sup>x</sup> —Na2—F4 <sup>v</sup>      | 84.4 (2)    | F2 <sup>x</sup> —Na4—U1                  | 89.8 (3)    |
| F4 <sup>iii</sup> —Na2—F4 <sup>v</sup>    | 91.55 (16)  | Na2—Na4—U1                               | 76.6 (3)    |
| F4 <sup>vii</sup> —Na2—F4 <sup>v</sup>    | 174.1 (2)   | Na1 <sup>xiii</sup> —Na4—U1              | 136.9 (4)   |
| F4—Na2—Na4 <sup>v</sup>                   | 50.7 (3)    | U1 <sup>v</sup> —Na4—U1                  | 148.8 (4)   |
| F4 <sup>ix</sup> —Na2—Na4 <sup>v</sup>    | 132.3 (3)   | U1 <sup>xi</sup> —F1—Na1                 | 133.12 (17) |
| F4 <sup>x</sup> —Na2—Na4 <sup>v</sup>     | 98.1 (3)    | U1 <sup>xi</sup> —F1—U1 <sup>vi</sup>    | 116.28 (14) |
| F4 <sup>iii</sup> —Na2—Na4 <sup>v</sup>   | 76.0 (3)    | Na1—F1—U1 <sup>vi</sup>                  | 108.65 (14) |
| F4 <sup>vii</sup> —Na2—Na4 <sup>v</sup>   | 140.9 (2)   | U1 <sup>xi</sup> —F1—Na4 <sup>vii</sup>  | 109.1 (3)   |
| F4 <sup>v</sup> —Na2—Na4 <sup>v</sup>     | 44.3 (2)    | Na1—F1—Na4 <sup>vii</sup>                | 79.8 (3)    |
| F4—Na2—Na4 <sup>iii</sup>                 | 98.1 (3)    | U1 <sup>vi</sup> —F1—Na4 <sup>vii</sup>  | 93.6 (3)    |
| F4 <sup>ix</sup> —Na2—Na4 <sup>iii</sup>  | 76.0 (3)    | U1—F2—U1 <sup>xi</sup>                   | 151.86 (18) |
| F4 <sup>x</sup> —Na2—Na4 <sup>iii</sup>   | 140.9 (2)   | U1—F2—Na3                                | 101.58 (13) |
| F4 <sup>iii</sup> —Na2—Na4 <sup>iii</sup> | 44.3 (2)    | U1 <sup>xi</sup> —F2—Na3                 | 99.29 (12)  |
| F4 <sup>vii</sup> —Na2—Na4 <sup>iii</sup> | 50.7 (3)    | U1—F2—Na4 <sup>vii</sup>                 | 95.6 (3)    |
| F4 <sup>v</sup> —Na2—Na4 <sup>iii</sup>   | 132.3 (3)   | U1 <sup>xi</sup> —F2—Na4 <sup>vii</sup>  | 101.5 (3)   |
| Na4 <sup>v</sup> —Na2—Na4 <sup>iii</sup>  | 117.21 (14) | Na3—F2—Na4 <sup>vii</sup>                | 94.2 (3)    |
| F4—Na2—Na4 <sup>ix</sup>                  | 140.9 (2)   | Na1—F3—Na4 <sup>vii</sup>                | 89.5 (3)    |
| F4 <sup>ix</sup> —Na2—Na4 <sup>ix</sup>   | 44.3 (2)    | Na1—F3—U1                                | 113.65 (18) |
| F4 <sup>x</sup> —Na2—Na4 <sup>ix</sup>    | 50.7 (3)    | Na4 <sup>vii</sup> —F3—U1                | 111.6 (4)   |
| F4 <sup>iii</sup> —Na2—Na4 <sup>ix</sup>  | 132.3 (3)   | Na1—F3—U1 <sup>iii</sup>                 | 120.80 (19) |
| F4 <sup>vii</sup> —Na2—Na4 <sup>ix</sup>  | 98.1 (3)    | Na4 <sup>vii</sup> —F3—U1 <sup>iii</sup> | 96.3 (4)    |
| F4 <sup>v</sup> —Na2—Na4 <sup>ix</sup>    | 76.0 (3)    | U1—F3—U1 <sup>iii</sup>                  | 118.16 (15) |
| Na4 <sup>v</sup> —Na2—Na4 <sup>ix</sup>   | 117.21 (14) | Na2—F4—U1                                | 150.3 (2)   |
| Na4 <sup>iii</sup> —Na2—Na4 <sup>ix</sup> | 117.21 (14) | Na2—F4—Na4                               | 93.8 (3)    |
| F4—Na2—Na4 <sup>x</sup>                   | 132.3 (3)   | U1—F4—Na4                                | 107.4 (3)   |
| F4 <sup>ix</sup> —Na2—Na4 <sup>x</sup>    | 50.7 (3)    | Na2—F4—Na4 <sup>v</sup>                  | 87.3 (3)    |
| F4 <sup>x</sup> —Na2—Na4 <sup>x</sup>     | 44.3 (2)    | U1—F4—Na4 <sup>v</sup>                   | 99.6 (3)    |
| F4 <sup>iii</sup> —Na2—Na4 <sup>x</sup>   | 140.9 (2)   | Na4—F4—Na4 <sup>v</sup>                  | 31.9 (6)    |
| F4 <sup>vii</sup> —Na2—Na4 <sup>x</sup>   | 76.0 (3)    | Na2—F4—Na3                               | 84.21 (14)  |

|                                           |           |                                        |             |
|-------------------------------------------|-----------|----------------------------------------|-------------|
| F4 <sup>v</sup> —Na2—Na4 <sup>x</sup>     | 98.1 (3)  | U1—F4—Na3                              | 104.92 (15) |
| Na4 <sup>v</sup> —Na2—Na4 <sup>x</sup>    | 134.4 (4) | Na4—F4—Na3                             | 114.0 (4)   |
| Na4 <sup>iii</sup> —Na2—Na4 <sup>x</sup>  | 107.5 (4) | Na4 <sup>v</sup> —F4—Na3               | 144.1 (3)   |
| Na4 <sup>ix</sup> —Na2—Na4 <sup>x</sup>   | 23.7 (5)  | U1 <sup>xiv</sup> —F5—U1               | 153.01 (19) |
| F4—Na2—Na4 <sup>vii</sup>                 | 76.0 (3)  | U1 <sup>xiv</sup> —F5—Na4              | 105.4 (3)   |
| F4 <sup>ix</sup> —Na2—Na4 <sup>vii</sup>  | 98.1 (3)  | U1—F5—Na4                              | 96.5 (3)    |
| F4 <sup>x</sup> —Na2—Na4 <sup>vii</sup>   | 132.3 (3) | U1 <sup>xiv</sup> —F5—Na4 <sup>v</sup> | 115.4 (3)   |
| F4 <sup>iii</sup> —Na2—Na4 <sup>vii</sup> | 50.7 (3)  | U1—F5—Na4 <sup>v</sup>                 | 91.4 (3)    |
| F4 <sup>vii</sup> —Na2—Na4 <sup>vii</sup> | 44.3 (2)  | Na4—F5—Na4 <sup>v</sup>                | 29.9 (6)    |

Symmetry codes: (i)  $-x+y, -x+1, z$ ; (ii)  $y, -x+y, -z+2$ ; (iii)  $-x, -x+y, -z+3/2$ ; (iv)  $-y, x-y+1, z$ ; (v)  $y, x, -z+3/2$ ; (vi)  $-x+y-1, -x, z$ ; (vii)  $-y, x-y, z$ ; (viii)  $x-1, y, z$ ; (ix)  $x-y, -y, -z+3/2$ ; (x)  $-x+y, -x, z$ ; (xi)  $x-y, x, -z+2$ ; (xii)  $-x, -y, -z+2$ ; (xiii)  $x+1, y, z$ ; (xiv)  $-y+1, x-y+1, z$ .

All esds (except the esd in the dihedral angle between two l.s. planes) are estimated using the full covariance matrix. The cell esds are taken into account individually in the estimation of esds in distances, angles and torsion angles; correlations between esds in cell parameters are only used when they are defined by crystal symmetry. An approximate (isotropic) treatment of cell esds is used for estimating esds involving l.s. planes.
